# Supplementary material
Source: Research Square preprint supplement (doi:10.21203/rs.3.rs-9937322/v1)
Supplement: Supplementary file 1 [file 385ed2d1f1885dc6234a12d6.docx]

**CRISPR-Cas9–Mediated Genome Editing in Avocado:** **Advances in Editing Efficiency and Regeneration**

**Authors**

**Sudipta Das Bhowmik1, Nathan Kimber1, Georgie Stephan1, Maiko Kato1, Peter Prentis1, Graham Anderson2, Revel Drummond3, Toshi Foster3, Leena Thung1**

1Centre for Agriculture and Bioeconomy, Queensland University of Technology, Brisbane, Queensland, Australia | 2Anderson Horticulture Pty Ltd, 392 Duranbah Rd, Duranbah NSW | 3Bioeconomy Science Institute, Plant and Food Group, New Zealand

Corresponding author: Leena Thung (l2.thung@qut.edu.au)

**Supplementary Tables**

**Supplementary Table S1. Growth medium for induction of embryogenic cell cultures in Reed, Velvick and Kidd avocado varieties**

| **Medium** | **Major salt**  **(1X)** | **Minor salt (1X)** | **Growth Regulator Picloram (mg l⁻¹)** | **Activated charcoal**  **(%)** | **Thiamine-HCl**  **(mg l⁻¹)** | **Myo-inositol (mg l⁻¹)** | **Sucrose (g l⁻¹)** | **Agar**  **(g l⁻¹)** |
| --- | --- | --- | --- | --- | --- | --- | --- | --- |
| MSP | MS | MS | 0.1 | 0 | 4 mg l⁻¹ | 100 | 30 | 8 |
| MSP-AC | MS | MS | 0.1 | 0.1 | 4 mg l⁻¹ | 100 | 30 | 8 |
| SI | B5 | MS | 0.1 | 0 | 4 mg l⁻¹ | 100 | 30 | 8 |
| SI-AC | B5 | MS | 0.1 | 0.1 | 4 mg l⁻¹ | 100 | 30 | 8 |

MSP- MS major containing picloram; MSP-AC – MS major containing picloram and activated charcoal; SI – B5 major containing picloram; SI-AC- B5 major containing picloram and activated charcoal

**Supplementary Table S2.** ***P. americana* ARF3 orthologs and corresponding protospacer sequences.**

| **Target orthologs** | **protospacer 1** | **protospacer 2** | **CRISPR plasmids** |
| --- | --- | --- | --- |
| Ctg106 | TAGTGGTGTACTTTCCACAG | ACACGGCAGAAAACATGAGG | KS106 |
| Ctg52 | GAAAGAGAAAAGGCACAAAA | TGCTGTGACTGTAGCAGTTG | RU52, KU52 |
| Scf59 | GTTGATTTCGCGTAAGATAA | AAGATAACAGTATTTTAATG | RU59, KU59 |

**Supplementary Table S3.Primers for genotyping PCR.**

| **Screening primers** | **5’- 3’** |
| --- | --- |
| Ctg52ARF3p_19109F | AGATGAGAGGAGGAAATACAC |
| Ctg52ARF3_18592R | CATAGCTCCAAACAAATAGCAG |
| Scf59p_2981F | GGTCAGGGTGTAACTGTAAC |
| Scf59CDS1_3579R | GGTTTTCGAGAGCATCGTC |
| ctg106_2537F | CCAACTAAATGCAGGGATACTAA |
| ctg106_2965R | CCAGTAATTTCAGCACTGTAAGTG |
| 35S:RUBY 7135-7155 REV | AGTCTGAGGGAAATGAGTGGG |
| 35S for | CGCACAATCCCACTATCCTT |
| VirC1 | GCCTTAAAATCATTTGTAGCGACTTCG |
| VirC2 | TCATCGCTAGCTCAAACCTGCTTCTG |

**Supplementary Table S4. Transformation efficiency in in Reed, Velvick and Kidd using RUBY reporter gene**

| **Variety** | **Total number of callus clump (n=3)** | **Total no of RUBY expressing clumps** | **Transformation efficiency ±SE (%)** |
| --- | --- | --- | --- |
| Reed | 120 | 16 | 13±2.3 |
| Velvick | 120 | 55 | 46±5.6 |
| Kidd | 120 | 64 | 53.3±8.5 |

Total number of explants = 120. The values are the means of three experiments (n = 3)

**Supplementary Table S5.** **Transformation and double editing efficiency in Reed, Velvick and Kidd with three CRISPR Cas9 gene editing constructs**

| **Variety** | **CRISPR**  **Constructs** | **Transformation efficiency ±SE (%)** | | | **Double editing efficiency ±SE (%)** |
| --- | --- | --- | --- | --- | --- |
| Reed | KU52 | | 18.4±1.2​ | 16.8±2.6 | |
| KU59 | | 12.5±1.4 | 35.5±9.8​ | |
| KS106 | | 8.3±0.4 | 69.4±2.8​ | |
| Velvick | KU52 | | 34.1±4.4 | 12.1±1.8 | |
| KU59 | | 45.8±2.2 | 0.0±0.0 | |
| KS106 | | 58.3±2.2 | 8.6±2.7 | |
| Kidd | KU52 | | 68.3±3.6 | 21.8±3.4 | |
| KU59 | | 33.3±5.8 | 0.0±0.0 | |
| KS106 | | 55.8±8.8 | 18.3±2.7 | |

Total number of explants = 120. The values are the means of three experiments (n = 3)
