# Supplementary material
Source: Research Square preprint supplement (doi:10.21203/rs.3.rs-9937322/v1)

**Supplementary file**


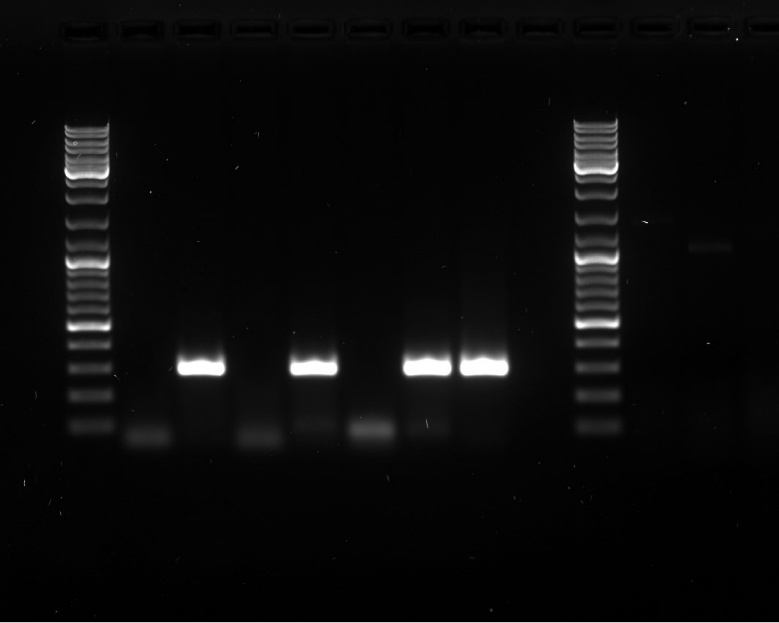


Fig 2b. RUBY


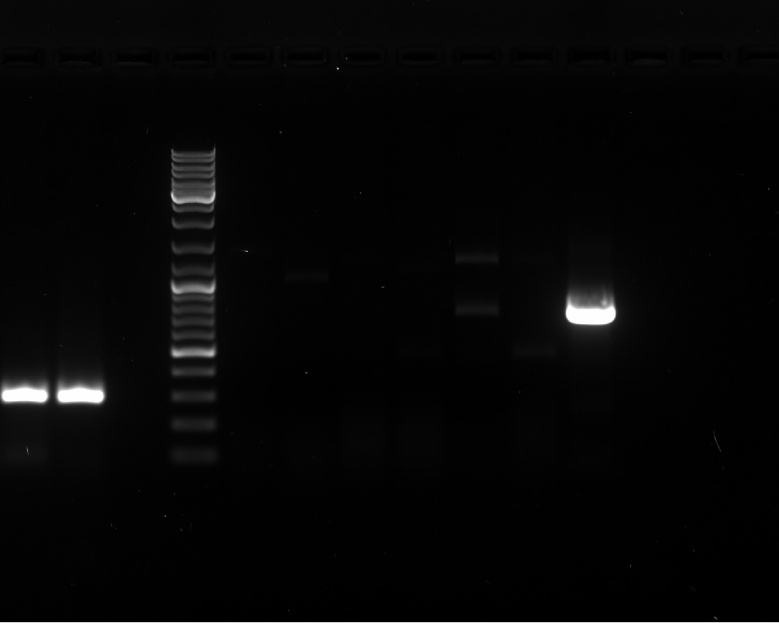


Fig 2b. VirC


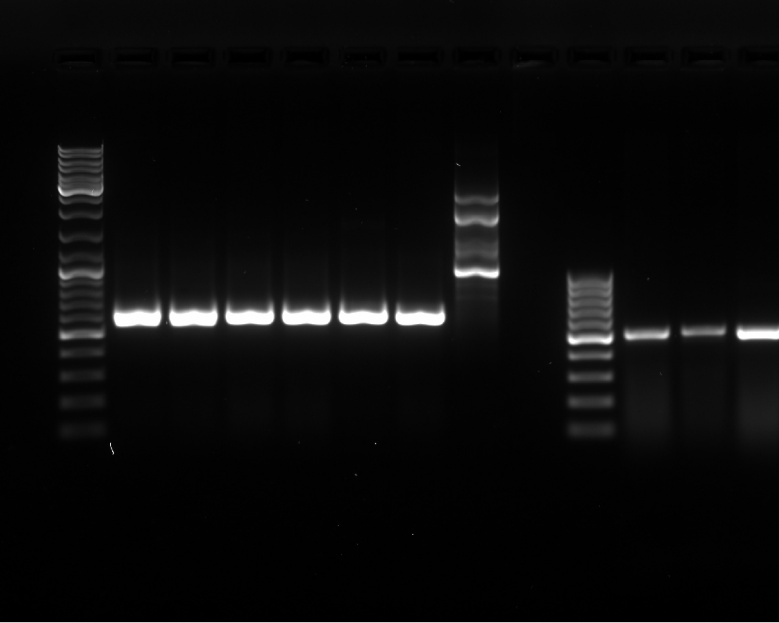


Fig 2b. *P. americana* native gene


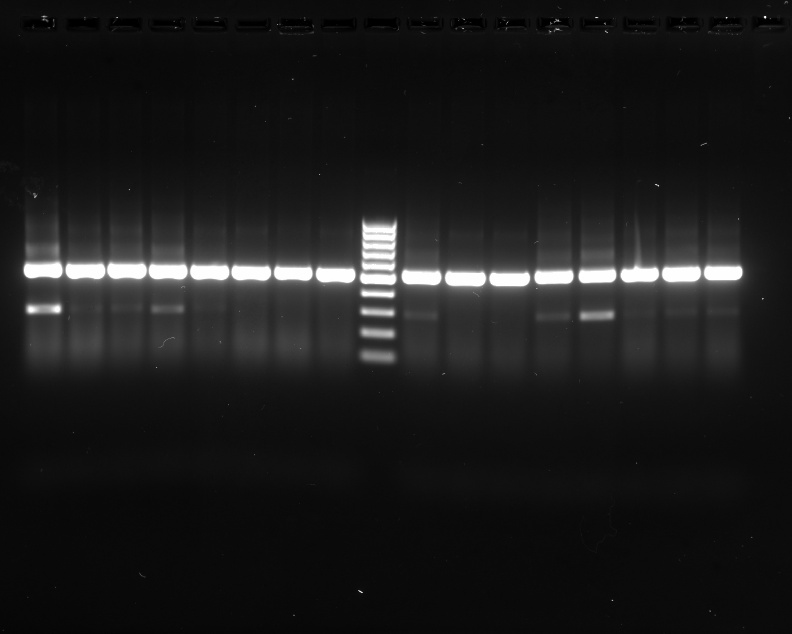


Fig 3b. RU52.


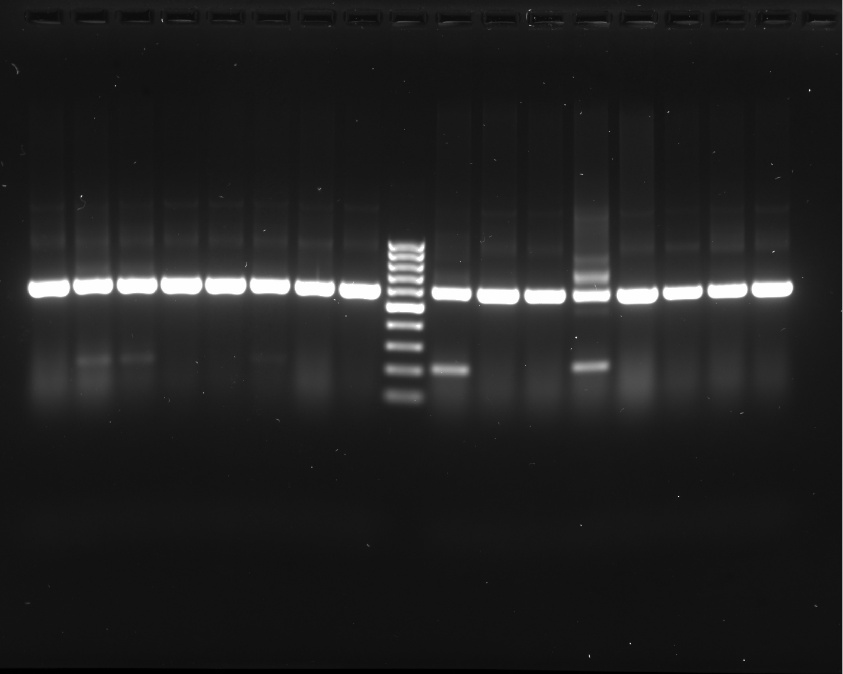
Fig 3b. RU59.


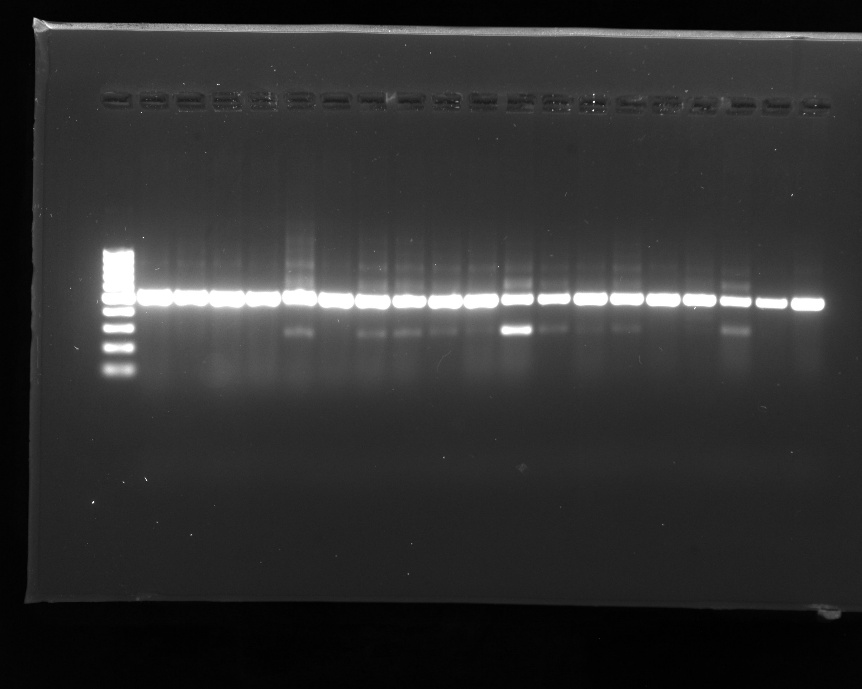


Fig 4d. KU-52


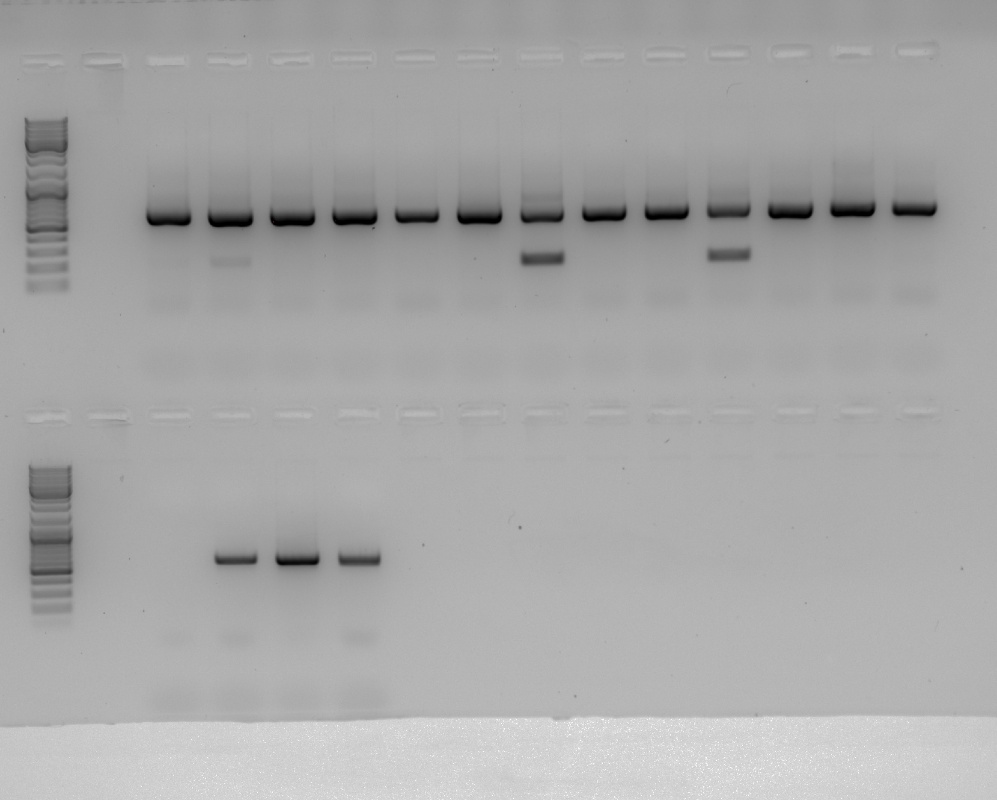


Fig 5b.

Supplement: Supplementary file 2 [file 66a927336bf0f8f830fbed16.docx]
